# Supplementary material for: Affinity-based thermoresponsive precipitation of proteins modified with polymer-binding peptides
Source: Royal Society of Chemistry journal article supplement (doi:10.1039/c6cc00594b), 2016-01-01
Supplement: c6cc00594b1.pdf [file c6cc00594b1.pdf]

Electronic Supplementary Information

**Affinity-based thermoresponsive precipitation of proteins  
modified with polymer-binding peptides**

Seigo Suzuki, Toshiki Sawada, Takashi Ishizone and Takeshi Serizawa\*

Department of Organic and Polymeric Materials, Graduate School of Science and Engineering, Tokyo Institute of Technology, 2-12-1 Ookayama, Meguro-ku, Tokyo 152-8550, Japan

Fax: +81-3-5734-2128; E-mail: serizawa@polymer.titech.ac.jp

## Experimental details

**Materials.** A Ph.D-12™ Phage Display Peptide Library Kit and *Escherichia coli* strain ER2738 were purchased from New England Biolabs. NovaSynTGR resin, 9-fluorenylmethyloxycarbonyl (Fmoc) amino acid derivatives, and 2-(1*H*-benzotriazole-1-yl)-1,1,3,3-tetramethyluronium hexafluorophosphate were purchased from Novabiochem. 1-Hydroxybenzotriazole monohydrate and *N,N'*-tetramethylenebismaleimide were purchased from Tokyo Chemical Industry Corporation. Bovine serum albumin was purchased from Wako Pure Chemical Industries. Human serum albumin (HSA, lyophilized powder, fatty acid free, globulin free, ≥99%) and  $\alpha$ -cyano-4-hydroxycinnamic acid (CHCA) were purchased from Sigma-Aldrich. All other reagents were purchased from Nacalai Tesque. Ultrapure water with more than 18.2 M $\Omega$ ·cm was supplied by a Milli-Q system (Merck Millipore) and was used for all the experiments.

**Peptide screening against PNIPAM films.** The target films composed of water-insoluble poly(*N*-isopropylacrylamide) (PNIPAM,  $M_n = 11\ 000$ ,  $M_w/M_n = 1.20$ ,  $m : r = 85 : 15$ ) synthesized by living anionic polymerization<sup>1</sup> were prepared by spin-casting (2000 rpm, 1 min) from a *N,N*-dimethylformamide (DMF) solution at a polymer concentration of 20 mg mL<sup>-1</sup> on a glass substrate. Then, the resulting films were vacuum dried for 5 h. Affinity-based peptide screening against the PNIPAM films was performed according to our previously published protocols.<sup>2,3</sup> An aliquot (5  $\mu$ L) containing  $1.2 \times 10^{10}$  plaque-forming units (pfu) of the phage library solution in Tris-buffered saline (TBS, 50 mM Tris, 150 mM NaCl, pH 7.5) was mounted on the target films for 10 min at 30 °C. The films were previously conditioned with TBS for 12 h at 30 °C before mounting the phage library solution. Unbound and weakly bound phages were removed by rinsing the films once using 100  $\mu$ L of TBS containing 0.1% Tween 20 and then five times using 200  $\mu$ L of TBS. The bound phages were eluted by mounting 100  $\mu$ L of the elution buffer solution (0.5 M glycine-HCl containing 1 mg mL<sup>-1</sup> bovine serum albumin, pH 2.2) on the films for 15 min at 30 °C. The solution containing the eluted phages was neutralized with 5.7  $\mu$ L of a Tris-buffer solution (1 M Tris, pH 9.1). The eluted phages were amplified by infection with *Escherichia coli* strain ER2738, and the amplified phages were then purified using a polyethylene glycol/NaCl solution for use in the next round of peptide screening. Five rounds of peptide screening were repeated, followed by cloning and DNA sequencing of the phages.

**Phage binding assay.** The binding capabilities of the screened and wild type phages against the target PNIPAM films were evaluated by titer counting assays. The PNIPAM films were prepared on a 96-well glass plate and were pre-conditioned with TBS for 12 h before

performing the binding assay. Phage solutions (10 pM in TBS, 50  $\mu$ L/well) were mounted on the films for 1 h at 20 or 30  $^{\circ}$ C. After rinsing the samples four times with TBS containing 0.1% Tween 20 (100  $\mu$ L/well) and then once with TBS (200  $\mu$ L/well) at 20 or 30  $^{\circ}$ C, the bound phages were eluted using the elution buffer solution (100  $\mu$ L/well) for 15 min at 20 or 30  $^{\circ}$ C. The eluted phage solutions were neutralized using a Tris-buffer solution, and the amounts of phages in the solutions were determined by titer counting assays.

**Solid-phase peptide synthesis.** Peptides with a free N-terminus and an amidated C-terminus were prepared by solid-phase peptide synthesis using standard Fmoc-based procedures according to a previously published protocol.<sup>4</sup> The peptide chains were assembled on a NovaSynTGR resin (amino group 0.25 mmol  $g^{-1}$ ) using Fmoc amino acid derivatives (3 equiv.) with 2-(1*H*-benzotriazole-1-yl)-1,1,3,3-tetramethyluronium hexafluorophosphate (3 equiv.), 1-hydroxybenzotriazole monohydrate (3 equiv.), and *N,N*-diisopropylethylamine (6 equiv.) in *N*-methylpyrrolidone (NMP) for coupling, and using 20% piperidine in NMP for Fmoc group removal. To cleave the peptides from the resin and to remove the side chain protecting groups, the resins were treated with trifluoroacetic acid (TFA)/thioanisole/*m*-cresol (10/0.75/0.25, v/v/v) for 3 h. The crude peptides were purified by reverse-phase high-performance liquid chromatography (ELITE LaChrom, HITACHI High-Technologies) using a C18 column (COSMOSIL 5C18-AR-300, 20  $\times$  150 mm, Nacalai Tesque) with a linear gradient from 99.9%  $H_2O$ /0.1% TFA to 99.9% acetonitrile/0.1% TFA at a flow rate of 6 mL  $min^{-1}$ . The peptides were identified by liquid chromatography-mass spectrometry (Prominence UFLC system, MS-2020, Shimadzu) and matrix-assisted laser desorption ionization time-of-flight mass spectrometry (MALDI-TOF-MS, AXIMA-CFR mass spectrometer, Shimadzu) using CHCA as a matrix reagent.

**Preparation of peptide-modified HSA.** HSA with a maleimide group was prepared by reacting *N,N'*-tetramethylebismaleimide with the Cys34 residue of HSA according to the following procedure. *N,N'*-Tetramethylebismaleimide (15 mM, 50  $\mu$ L) in DMF was mixed with HSA (170  $\mu$ M, 450  $\mu$ L) in phosphate-buffer saline (PBS, 8.1 mM  $Na_2HPO_4$ , 1.47 mM  $KH_2PO_4$ , 137 mM NaCl, 2.7 mM KCl, pH 7.4) for 3 d at 37  $^{\circ}$ C. The products were purified by dialysis (MWCO: 12-14 kDa) in PBS at 4  $^{\circ}$ C. The amount of unmodified Cys residues of HSA was quantified using Ellman's reagent. HSA (3  $\mu$ M) was mixed with 5-(3-carboxy-4-nitrophenyl)disulfanyl-2-nitrobenzoic acid (10  $\mu$ M) in PBS for 1 h at ambient temperature. The amount of Cys residues of HSA was determined by ultraviolet-visible (UV-vis) spectra (V-550, Jasco). The c2 peptide with an additional Cys residue at the C-terminus (1.7 mM) was reacted with HSA with a maleimide group (170  $\mu$ M) in PBS (pH 7.4) for 3 d at 37  $^{\circ}$ C to prepare peptide-modified HSA. The products were purified by dialysis (MWCO: 12-14 kDa) in water at 4  $^{\circ}$ C and were then lyophilized. The peptide-

modified HSA was identified by MALDI-TOF-MS spectrometry using CHCA as a matrix reagent.

**Preparation of fluorescently labeled peptide-modified HSA.** To quantify HSA after the thermoresponsive precipitation experiments, the amino groups of the Lys residues of HSA were labeled with fluorescent molecules. 5-Carboxyfluorescein *N*-succinimidyl ester (10 mM) was reacted with HSA with a maleimide group (150  $\mu$ M) in PBS for 2 h at 25 °C, and the products were then purified by dialysis (MWCO: 12-14 kDa) in PBS at 4 °C. The number of fluorescein molecules introduced to a single HSA was determined to be 4.6 based on UV-vis absorption spectra (V-550, Jasco). Modification of the fluorescently labeled HSA with peptides was performed according to the aforementioned procedure.

**SPR measurements.** The films composed of the target PNIPAM and isotactic poly(methyl methacrylate) (it-PMMA,  $M_n = 35\,500$ ,  $M_w/M_n = 1.12$ ,  $mm : mr : rr = 98 : 2 : 0$ , synthesized following conventional living anionic polymerization<sup>5</sup>) as a reference polymer were applied for SPR measurements using a Biacore X (GE healthcare) according to our previously published protocol.<sup>6</sup> The PNIPAM and it-PMMA films with a thickness of approximately 15 and 10 nm, respectively, were prepared on gold-coated glass slides (SIA Kit Au, GE Healthcare) by spin-casting (2000 rpm, 1 min). HBS-N (10 mM HEPES, 150 mM NaCl; pH 7.4, GE Healthcare) was flowed at a rate of 20  $\mu$ L  $\text{min}^{-1}$  at 20 °C. After stabilization of the baselines by the HBS-N flow, the peptide solutions in HBS-N were applied to the films during 0 - 180 s (association), and then the peptide-free HBS-N was flowed during 180 - 1000 s (dissociation). The resulting sensorgrams at four peptide concentrations were analyzed using the global fitting of BIAevaluation software version 4.1. The chi-square ( $\chi^2$ ) values were evaluated to be 1.3, 1.8, and 0.7 (an index of fitting reliability) for the c2 peptide against the PNIPAM films, the c2 peptide against the it-PMMA films, and the inverted c2 peptide against the PNIPAM films, respectively. The  $\chi^2$  values of less than 10 are considered to be acceptable according to the BIAevaluation handbook. In the case of the SPR measurements of peptide-modified HSA or native HSA against the PNIPAM films, the association ( $k_1$ ) and dissociation ( $k_{-1}$ ) rate constants were determined by plotting the observed rate constant ( $k_{\text{obs}}$ ) using the following linear function:  $k_{\text{obs}} = k_1 C + k_{-1}$ , where  $C$  represents the protein concentration.

**Lower critical solution temperature (LCST) measurements.** Two PNIPAMs with different meso diad content (meso-rich PNIPAM:  $M_n = 7\,600$ ,  $M_w/M_n = 1.15$ ,  $m : r = 58 : 42$ ; meso-poor PNIPAM:  $M_n = 13\,000$ ,  $M_w/M_n = 1.12$ ,  $m : r = 17 : 83$ ) synthesized by living anionic polymerizations<sup>1</sup> were used for the LCST measurements. Aqueous PNIPAM solutions (0.5 mg  $\text{mL}^{-1}$ ) with or without 880  $\mu$ M of peptides were incubated for 1 h at 20 °C.

The turbidity of the solutions derived from transmittance at 500 nm using a 2 mm-thick quartz cell was monitored using a UV-vis spectrophotometer (V-550, Jasco) during heating of the solutions from 20 °C to 50 °C at a heating rate of 0.1 °C min<sup>-1</sup> without stirring. The LCSTs were determined as the temperature of 50% transmittance.

**Circular dichroism (CD) spectra.** The CD spectra of the peptide-modified HSA and native HSA dissolved in phosphate-buffer solutions (10 mM phosphate, pH 7.5) at a concentration of 1.7 μM were recorded on a CD spectrometer (J-725, JASCO) under a N<sub>2</sub> atmosphere at 20 °C using a quartz cell with a thickness of 0.2 cm. The data represents the average of four scans in the wavelength range of 190-260 nm with a resolution of 0.5 nm and a scanning speed of 50 nm min<sup>-1</sup>.

**Thermoresponsive precipitation of HSA with PNIPAM.** Aqueous solutions of meso-rich PNIPAM (2.0 mg mL<sup>-1</sup>, 100 μL) containing fluorescently labeled HSA (100 nM) with or without peptide modification were incubated for 20 min at 20 °C and were heated to 50 °C at a heating rate of 0.1 °C min<sup>-1</sup> using a thermal cycler (PC-320, ASTEC). The heated solutions were incubated for 30 min at 50 °C and were centrifuged (12100 g, 30 min) at 50 °C. Then, 15 μL of the supernatants were diluted by 5 times. The fluorescence intensities at 525 nm (peptide-modified HSA) or 521 nm (non-modified HSA) excited at 496 nm were recorded on a fluorescent spectrophotometer (FP-6500, Jasco) at 25 °C to quantify the amount of HSA in the supernatants.

**Table S1** The LCSTs of PNIPAMs in the presence or absence of peptides

| PNIPAM    | LCST (°C) <sup>a</sup> |                     |             |
|-----------|------------------------|---------------------|-------------|
|           | C2 peptide             | Inverted c2 peptide | Peptide (-) |
| Meso-rich | 36.2 ± 0.0             | 38.3 ± 0.1          | 38.3 ± 0.2  |
| Meso-poor | 38.3 ± 0.1             | 38.1 ± 0.1          | 38.1 ± 0.0  |

<sup>a</sup>LCSTs and their standard deviations were obtained from triplicate experiments.

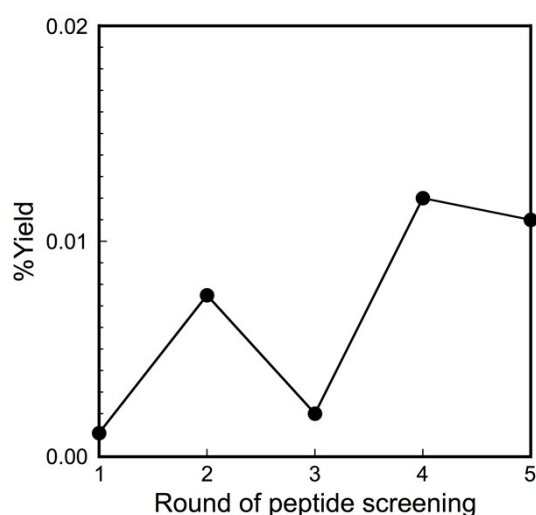

**Fig. S1** Percent yields (input/output phages) against the rounds of peptide screening.

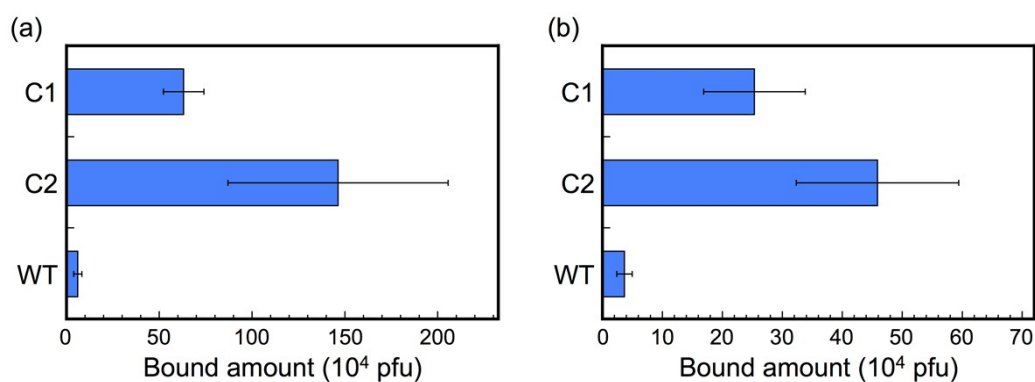

**Fig. S2** Bound amounts of the screened phages against the PNIPAM films at (a) 20 °C and (b) 30 °C. Bound amounts and their standard deviations were obtained from triplicate experiments.

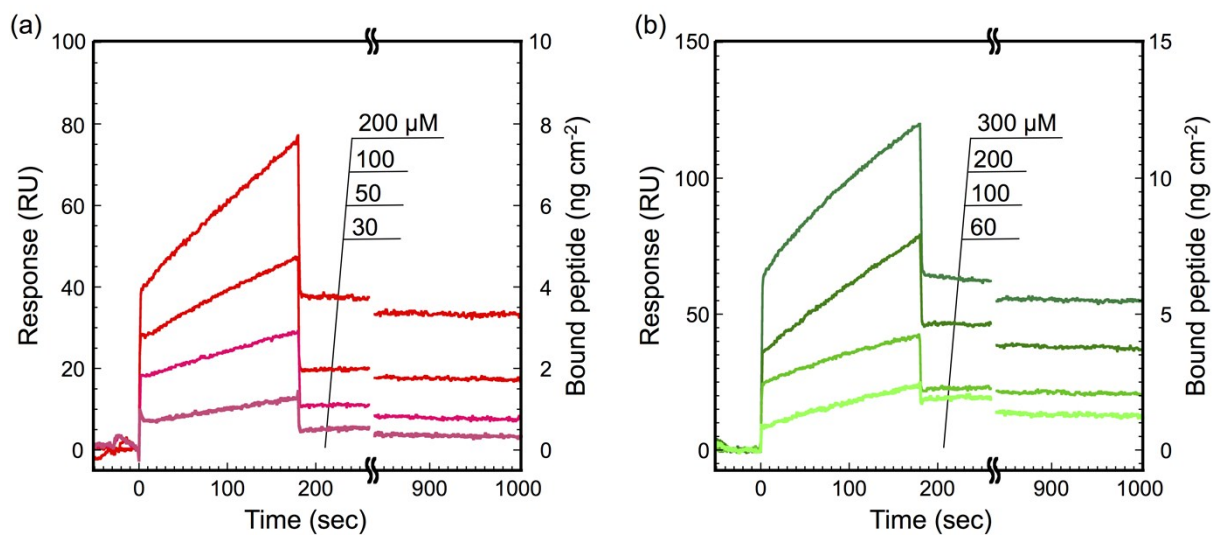

**Fig. S3** SPR sensorgrams for the binding of (a) the c2 peptide to the it-PMMA films, and (b) the inverted c2 peptide to the target PNIPAM films at different peptide concentrations.

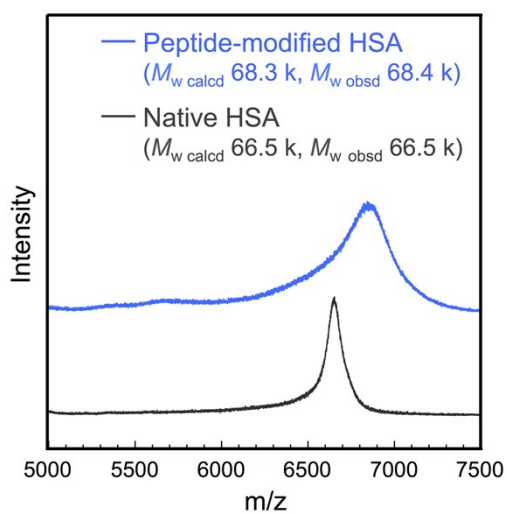

**Fig. S4** MALDI-TOF-MS spectra of the peptide-modified HSA and native HSA.

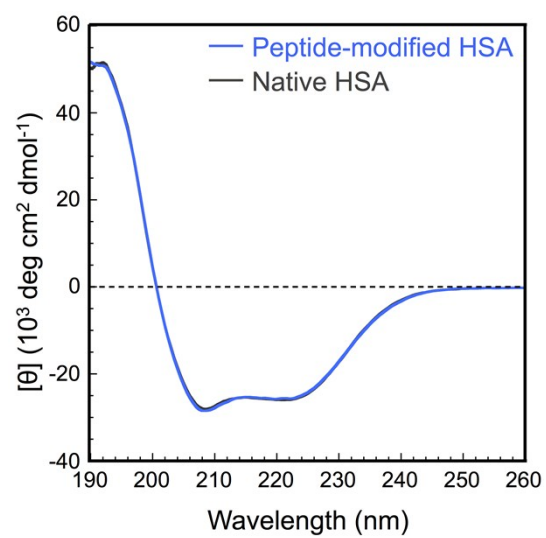

**Fig. S5** CD spectra of the peptide-modified HSA and native HSA.



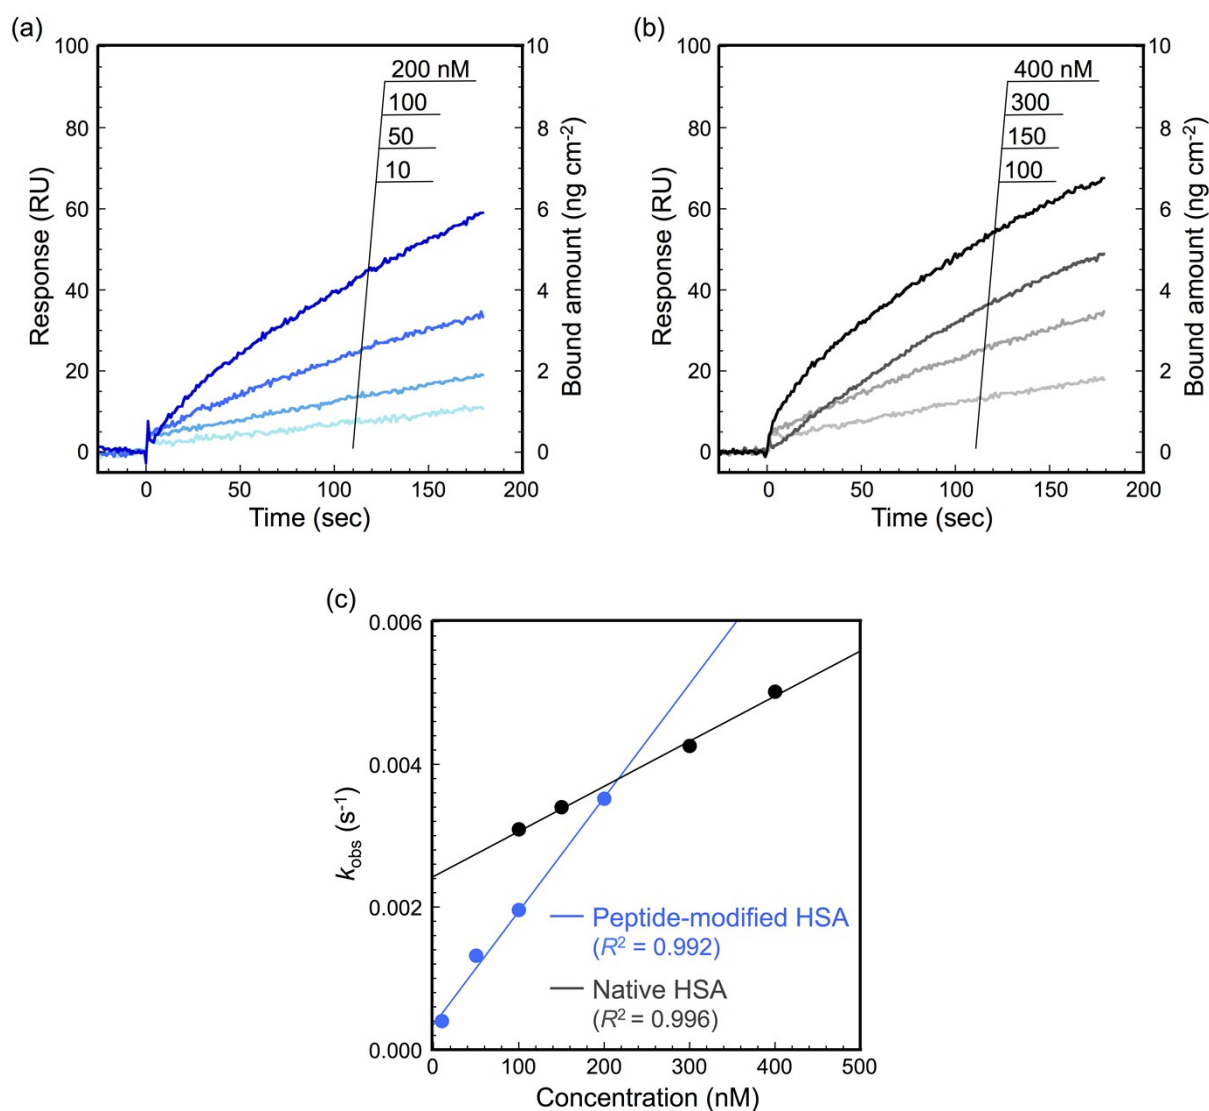

**Fig. S6** SPR sensorgrams for the binding of (a) peptide-modified HSA and (b) native HSA to the target PNIPAM films at different protein concentrations. (c) Plots of the  $k_{\text{obs}}$  of peptide-modified HSA and native HSA for the PNIPAM films as a function of the protein concentration.

**Table S2.** Kinetic parameters for binding of peptide-modified HSA and native HSA to the PNIPAM films

| Protein              | $k_1$ ( $10^3 \text{ M}^{-1} \text{ s}^{-1}$ ) | $k_{-1}$ ( $10^{-4} \text{ s}^{-1}$ ) | $K_a$ ( $10^7 \text{ M}^{-1}$ ) |
|----------------------|------------------------------------------------|---------------------------------------|---------------------------------|
| Peptide-modified HSA | 16                                             | 3.7                                   | 4.4                             |
| Native HSA           | 6.3                                            | 24                                    | 0.26                            |

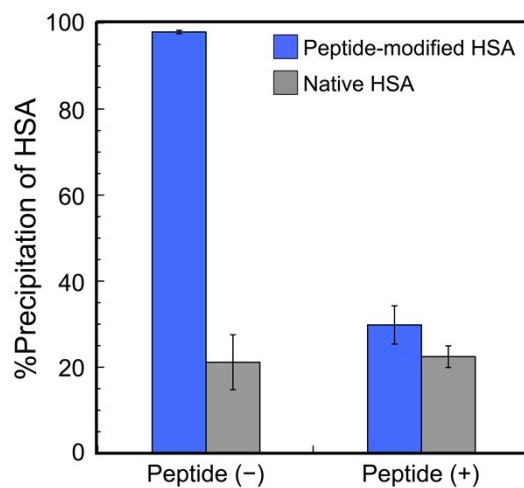

**Fig. S7** Percent precipitation of the peptide-modified HSA in the presence or absence of 50  $\mu\text{M}$  free peptides.

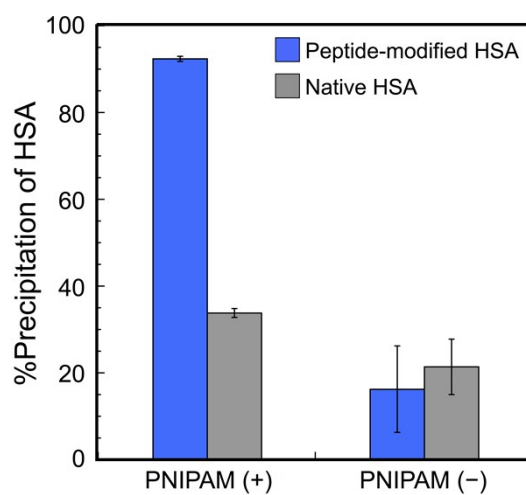

**Fig. S8** Percent precipitation of the peptide-modified HSA at an HSA concentration of 10 nM.

## References

- 1 M. Ito and T. Ishizone, *J. Polym. Sci., Part A: Polym. Chem.*, 2006, **44**, 4832-4845.
- 2 T. Serizawa, T. Sawada, H. Matsuno, T. Matsubara and T. Sato, *J. Am. Chem. Soc.*, 2005, **127**, 13780-13781.
- 3 T. Serizawa, H. Fukuta, T. Date and T. Sawada, *Chem. Commun.*, 2016, **52**, 2241-2244.
- 4 W. C. Chan and P. D. White, in *Fmoc Solid Phase Peptide Synthesis* eds. W. C. Chan and P. D. White, Oxford University: New York, 1st edn., 2000, pp. 41-76.
- 5 K. Hatada, K. Ute, K. Tanaka, Y. Okamoto and T. Kitayama, *Polym. J.*, 1986, **18**, 1037-1047.
- 6 T. Serizawa, T. Sawada and H. Matsuno, *Langmuir*, 2007, **23**, 11127-11133.
